# Supplementary material
Source: Research Square preprint supplement (doi:10.21203/rs.3.rs-9260784/v1)
Supplement: Supplementary file 1 [file e807b2feafe606e2a0604ed2.doc]

**Supplementary Information for Abdurakhmonov et al.:**

**Long-term field performance of *PHYA1* RNAi cotton cultivars reveals sustained yield advantage and improved fibre quality**

Ibrokhim Y. Abdurakhmonov1,2*, Zabardast T. Buriev1, Mukhtor M. Darmanov1,2, Yuldoshbek A. Muhammadov1, Sharofiddin I. Mamanazarov1, Ilkhomjon E. Bozorov1, Akramjon B. Mamajanov1, Naim N. Khusenov1, Abdulla B. Isabaev1, Rakhimjon R. Akhmedov1, Haydarali S. Ruziboev1,3, Abdusalom K. Makamov1, Khurshida A. Ubaydullaeva1, Shukhrat E. Shermatov1, Mirzakamol S. Auybov1, Akmal A. Tulanov2, Abdustator Abdukarimov1

1Centre of Genomics and Bioinformatics, Academy of Sciences of Uzbekistan. University Street-2, Qibray, Tashkent 111218, Uzbekistan

2Ministry of Agriculture of the Republic of Uzbekistan. University Street-2, Qibray, Tashkent 100140, Uzbekistan
3Faculty of Biology and Ecology, National University of Uzbekistan, University Street-4, Olmazor, Tashkent 100174, Uzbekistan

*Correspondence to Ibrokhim Y. Abdurakhmonov: i.y.abdurakhmonov@gmail.com

**Supplementary Table S1 | Additive ANOVA of regional yield (unweighted reduced panel, Porloq-1, Porloq-2, Porloq-4 and Sulton)**

| **Source** | **Sum of Squares** | **df** | **Mean Square** | **F-value** | **P-value** | **η² (%)** |
| --- | --- | --- | --- | --- | --- | --- |
| Genotype | 5.30 | 3 | 1.77 | 8.64 | <0.001 | 3.62 |
| Zone | 10.02 | 12 | 0.84 | 4.08 | <0.001 | 6.84 |
| Year | 84.02 | 12 | 7.00 | 34.25 | <0.001 | 57.33 |
| Residual | 47.23 | 231 | 0.20 | – | – | 32.22 |
| **Total** | **146.565** | **258** | **–** | **–** | **–** | **100.00** |

**Supplementary Table S2 | Additive ANOVA of experimental-station yield (Qibray, 2013–2018 balanced panel)**

| **Source** | **Sum of Squares** | **df** | **Mean Square** | **F-value** | **P-value** | **η² (%)** |
| --- | --- | --- | --- | --- | --- | --- |
| Genotype | 4.32 | 7 | 0.62 | 4.70 | <0.001 | 46.1 |
| Year | 0.45 | 5 | 0.09 | 0.69 | 0.636 | 4.8 |
| Residual | 4.60 | 35 | 0.13 | – | – | 49.1 |
| **Total** | **9.38** | **47** | **–** | **–** | **–** | **100.0** |

**Supplementary Table S3 | MANOVA of combined HVI fibre traits**

| **Effect** | **Pillai's trace** | **Num DF** | **Den DF** | **F Value** | **P-value** |
| --- | --- | --- | --- | --- | --- |
| A. Experimental balanced panel (Qibray, 2013–2018): Observations: 48; genotypes: 8 | | | | | |
| C(genotype) | 2.29 | 42.0 | 210.0 | 3.08 | <0.001 |
| C(Year) | 1.73 | 30.0 | 170.0 | 3.01 | <0.001 |
| B. Regional reduced panel (Porloq-1, Porloq-2, Porloq-4, Sulton): Observations: 149; genotypes: 4; zones: 5; years: 2013–2025 | | | | | |
| C(genotype) | 1.03 | 18 | 354.0 | 10.27 | <0.001 |
| C(zone) | 1.50 | 72 | 726.0 | 3.35 | <0.001 |
| C(Year) | 1.19 | 72 | 726.0 | 2.48 | <0.001 |

Note: MANOVA was run on unweighted observations using Pillai’s trace. Significant values indicate multivariate shifts in combined fibre-trait space across genotype and environmental factors.

**Supplementary Table S4 | Univariate ANOVA of experimental-station HVI traits (Qibray, 2013–2018 balanced panel)**

| **Trait** | **Source** | **Sum of Squares** | **df** | **Mean Square** | **F-value** | **P-value** | **η² (%)** |
| --- | --- | --- | --- | --- | --- | --- | --- |
| **Mic** | Genotype | 1.356 | 7 | 0.194 | 8.031 | <0.001 | 48.903 |
| **Mic** | Year | 0.572 | 5 | 0.114 | 4.747 | 0.002 | 20.649 |
| **UHM** | Genotype | 0.104 | 7 | 0.015 | 76.650 | <0.001 | 92.729 |
| **UHM** | Year | 0.001 | 5 | 0.000 | 1.414 | 0.243 | 1.222 |
| **Unf** | Genotype | 45.653 | 7 | 6.522 | 4.938 | <0.001 | 42.069 |
| **Unf** | Year | 16.637 | 5 | 3.327 | 2.519 | 0.048 | 15.331 |
| **Str** | Genotype | 40.635 | 7 | 5.805 | 4.313 | 0.002 | 40.578 |
| **Str** | Year | 12.399 | 5 | 2.480 | 1.842 | 0.130 | 12.381 |
| **Elon** | Genotype | 10.803 | 7 | 1.543 | 3.024 | 0.014 | 13.393 |
| **Elon** | Year | 51.994 | 5 | 10.399 | 20.376 | <0.001 | 64.462 |
| **Rd** | Genotype | 55.738 | 7 | 7.963 | 4.043 | 0.002 | 34.317 |
| **Rd** | Year | 37.759 | 5 | 7.552 | 3.835 | 0.007 | 23.248 |

Note: For each trait, an additive unweighted ANOVA was fitted with genotype and year as fixed factors; η² gives the trait-specific proportion of total sum of squares attributable to each source.

**Supplementary Table S5 | Univariate ANOVA of regional HVI traits (reduced panel: Porloq-1, Porloq-2, Porloq-4 and Sulton)**

| **Trait** | **Source** | **Sum of Squares** | **df** | **Mean Square** | **F-value** | **P-value** | **η² (%)** |
| --- | --- | --- | --- | --- | --- | --- | --- |
| Mic | Genotype | 0.269 | 3 | 0.090 | 4.163 | 0.008 | 4.694 |
| Mic | Zone | 0.828 | 12 | 0.069 | 3.200 | <0.001 | 14.433 |
| Mic | Year | 2.030 | 12 | 0.169 | 7.846 | <0.001 | 35.390 |
| UHM | Genotype | 0.169 | 3 | 0.056 | 194.845 | <0.001 | 71.857 |
| UHM | Zone | 0.028 | 12 | 0.002 | 8.072 | <0.001 | 11.908 |
| UHM | Year | 0.003 | 12 | 0.000 | 0.922 | 0.527 | 1.360 |
| Unf | Genotype | 1.871 | 3 | 0.624 | 0.820 | 0.485 | 1.370 |
| Unf | Zone | 18.565 | 12 | 1.547 | 2.035 | 0.027 | 13.600 |
| Unf | Year | 24.086 | 12 | 2.007 | 2.640 | 0.004 | 17.646 |
| Str | Genotype | 44.915 | 3 | 14.972 | 5.811 | <0.001 | 7.388 |
| Str | Zone | 190.442 | 12 | 15.870 | 6.160 | <0.001 | 31.325 |
| Str | Year | 60.860 | 12 | 5.072 | 1.969 | 0.033 | 10.011 |
| Elon | Genotype | 3.482 | 3 | 1.161 | 0.950 | 0.419 | 1.544 |
| Elon | Zone | 37.491 | 12 | 3.124 | 2.558 | 0.005 | 16.631 |
| Elon | Year | 36.665 | 12 | 3.055 | 2.502 | 0.006 | 16.265 |
| Rd | Genotype | 20.061 | 3 | 6.687 | 1.691 | 0.172 | 3.083 |
| Rd | Zone | 10.130 | 12 | 0.844 | 0.213 | 0.998 | 1.557 |
| Rd | Year | 142.017 | 12 | 11.835 | 2.993 | 0.001 | 21.827 |

Note: For each trait, an additive unweighted ANOVA was fitted with genotype, zone and year as fixed factors on all available regional observations for the reduced four-genotype panel.

**Supplementary Table S6 | Pearson correlations among fibre quality traits (2013–2025)**

| **Group** | **Traits** | **UHM** | **MIC** | **STR** | **ELO** | **Unf** | **Rd** |
| --- | --- | --- | --- | --- | --- | --- | --- |
| **Traditional (Sulton); n=13 annual means** | **UHM** | 1 | +0.61* | -0.13 | -0.41 | +0.08 | -0.16 |
| **MIC** |  | 1 | +0.06 | -0.14 | +0.25 | +0.07 |
| **STR** |  |  | 1 | +0.62* | +0.77** | +0.70** |
| **ELO** |  |  |  | 1 | +0.39 | +0.75** |
| **Unf** |  |  |  |  | 1 | +0.70** |
| **Rd** |  |  |  |  |  | 1 |
| **RNAi (Porloq‑1–4); n=7 annual means** | **UHM** | 1 | -0.57 | +0.90** | +0.36 | +0.41 | -0.34 |
| **MIC** |  | 1 | -0.57 | -0.51 | -0.05 | -0.11 |
| **STR** |  |  | 1 | +0.64 | +0.04 | -0.11 |
| **ELO** |  |  |  | 1 | -0.51 | +0.50 |
| **Unf** |  |  |  |  | 1 | -0.83* |
| **Rd** |  |  |  |  |  | 1 |

Note: UHM = upper half mean length (inches); MIC = micronaire; STR = strength (g tex-1); ELO = elongation (%); Unf = uniformity (%); Rd = reflectance. Correlations are based on unweighted annual means across available observations. Significance: * P < 0.05; ** P < 0.01; *** P < 0.001.

**Supplementary Table S7 | Performance of newly introduced RNAi cultivars in the 2021–2025 period**

| **Cultivar** | **Years observed** | **n (region × year)** | **Total Area (ha)** | **Unweighted mean yield (t/ha)** |
| --- | --- | --- | --- | --- |
| Porloq-5 | 2021, 2024–2025 | 3 | 490 | 3.90±0.72 |
| Porloq-7 | 2024–2025 | 4 | 1,635 | 4.08±0.57 |

Note: Both varieties were statistically nonsignificant at P < 0.05, compared to the traditionally grown ‘Sulton’ cultivar in relevant zones.

**Supplementary Table S8 | Performance by agro‑climatic zone (2013–2025)**

| **Cultivar type** | **n (Yield)** | **Total Area (ha)** | **Yield (t/ha)** | **n (HVI)** | **MIC** | **UHM (inches)** | **STR (g tex-1)** |
| --- | --- | --- | --- | --- | --- | --- | --- |
| **Fergana Valley (Namangan, Andijan, Fergana)** | | | | | | | |
| Porloq 1–4 | 26 | 28,763 | 3.27±0.72 | 10 | 4.39±0.42 | 1.22±0.03*** | 34.66±3.68 |
| Sulton | 32 | 276,533 | 3.09±0.46 | 22 | 4.63±0.14 | 1.11±0.02 | 32.17±1.57 |
| **Desert Zone (Navoiy, Bukhara, Kashkadarya, and Surkhondaryo)** | | | | | | | |
| Porloq 1–4 | 44 | 252,040 | 3.23±0.67 | 21 | 4.61±0.25 | 1.22±0.04*** | 32.97±2.84** |
| Sulton | 32 | 280,070 | 3.00±0.74 | 23 | 4.62±0.11 | 1.12±0.01 | 30.71±2.26 |
| **Central Plains (Sirdaryo, Jizzakh, and Samarkand)** | | | | | | | |
| Porloq 1–4 | 30 | 87,443 | 2.86±0.91 | 9 | 4.37±0.31 | 1.23±0.04*** | 31.61±0.86* |
| Sulton | 35 | 786,134 | 2.76±0.87 | 35 | 4.54±0.10 | 1.12±0.01 | 30.69±1.59 |
| **Arid/Northern (Khorezm and Karakalpakstan)** | | | | | | | |
| Porloq 1–4 | 12 | 8,713 | 3.48±0.72 | 3 | 4.33±0.40 | 1.27±0.02** | 33.87±2.32 |
| Sulton | 21 | 392,051 | 2.97±0.73 | 11 | 4.72±0.06 | 1.14±0.01 | 31.15±1.82 |
| **Capital Region (Tashkent)** | | | | | | | |
| Porloq 1–4 | 17 | 36,629 | 3.05±0.83 | 5 | 4.50±0.46 | 1.21±0.03*** | 31.90±1.51 |
| Sulton | 13 | 284,511 | 2.96±0.78 | 13 | 4.57±0.08 | 1.09±0.01 | 31.35±1.27 |

**Notes:** Unweighted means ± SD across available observations. Zones follow the classification established in the previous study20. Significance for the RNAi group (‘Porloq-1–4’) was tested against the traditional cultivar (‘Sulton’) within the same zone using a two-sided Welch’s t-test: * P < 0.05; ** P < 0.01; *** P < 0.001. For the experimental station (Qibray), the zone is the Capital Region; data are included in the regional zone summaries only for the regional trials. Porloq-1–4 are RNAi cultivars, whereas 'Sulton' is a traditional cultivar widely grown in Uzbekistan.
